# Supplementary material for: Optimal Dietary Intake Composition of Choline and Betaine Is Associated with Minimized Visceral Obesity-Related Hepatic Steatosis in a Case-Control Study
Source: MDPI journal article supplement (doi:10.3390/nu14020261), 2022-01-08
Supplement: s1 [file s1]

**Table S1.** MDNs intakes of the HS and obesity-stratified subjects<sup>1,2</sup>

| MDNs Intake                                      | Control          | HS              | p Value |
|--------------------------------------------------|------------------|-----------------|---------|
| Folate                                           | 671 ± 480 (27)   | 555 ± 357 (30)  | 0.051   |
| DFE µg/day,(insufficient intake, %) <sup>3</sup> |                  |                 |         |
| Non-Obesity                                      | 712 ± 560 (28)   | 557 ± 288 (33)  | 0.205   |
| Obesity                                          | 622 ± 401 (25)   | 555 ± 366 (30)  |         |
| Betaine                                          | 233 ± 182 (21)   | 183 ± 105 (29)  | 0.017   |
| mg/day,(insufficient intake, %) <sup>4</sup>     |                  |                 |         |
| Non-Obesity                                      | 261 ± 207a (18)  | 174 ± 82ab (30) | 0.028   |
| Obesity                                          | 208 ± 153ab (23) | 185 ± 108b (29) |         |
| Choline                                          | 462 ± 231 (25)   | 430 ± 176 (21)  | 0.262   |
| mg/day, (insufficient intake, %) <sup>5</sup>    |                  |                 |         |
| Non-Obesity                                      | 505 ± 248 (18)   | 432 ± 210 (23)  | 0.152   |
| Obesity                                          | 424 ± 210 (30)   | 429 ± 172 (20)  |         |

<sup>1</sup>Data are presented as the mean ± SD for the continuous variables and as proportion (insufficiency rate :%) for the categorical variables. Variables that were not normally distributed were first log-transformed. The continuous variables were compared using the student t test or one-way ANOVA following tukey test. Values with different letter differ significantly at P < 0.05. <sup>2</sup>Obesity was defined by BMI (≥30 kg/m<sup>2</sup>), waist/hip circumference ratio (men ≥ 0.9 and female ≥0.85), visceral adiposity grade (≥10) or/and body fat (men ≥25 % and women ≥ 32 %). <sup>3</sup>Insufficient folate intake was defined as total intake below the folate EAR value for Taiwanese adults (320 µg/day). <sup>4</sup>Insufficient betaine intake was defined as total intake below 25 percentile of total subject intake (112 mg/day). <sup>5</sup>Insufficient choline intake was defined as total intake less than 70% AI value for Taiwanese adults of men (315 mg/day) and women (273 mg/day).

**Table S2.** Macronutrients intake of the total subjects and obesity subgroup<sup>1,2</sup>

| Macronutrient intake                | Control (n=104)      | HS (n=105)           | p Value |
|-------------------------------------|----------------------|----------------------|---------|
| <b>median (interquartile range)</b> |                      |                      |         |
| Energy, kcal/d                      | 1631<br>(1242, 2061) | 1513<br>(1093, 1943) | 0.19    |
| Non-Obesity                         | 1706<br>(1398, 2172) | 1398<br>(961, 2178)  | 0.13    |
| Obesity <sup>3</sup>                | 1544<br>(1167, 1846) | 1538<br>(1112, 1929) |         |
| Carbohydrate, % of energy           | 64 (56, 70)          | 63 (58, 68)          | 0.42    |
| Carbohydrate, g/d                   | 256 (189, 330)       | 244 (168, 302)       | 0.12    |
| Non-Obesity                         | 275<br>(211, 340)    | 196<br>(149, 353)    | 0.08    |
| Obesity                             | 236<br>(174, 310)    | 246<br>(173, 301)    |         |
| Protein, % of energy                | 18 (16, 21)          | 18 (16, 21)          | 0.79    |
| Protein, g/d                        | 75 (55, 97)          | 69 (50, 90)          | 0.28    |
| Non-Obesity                         | 81 (53, 115)         | 69 (47, 88)          | 0.33    |
| Obesity                             | 68 (56, 92)          | 71 (52, 91)          |         |
| Lipid, % of energy                  | 18 (14, 23)          | 19 (15, 23)          | 0.32    |

|                      |                |                 |      |
|----------------------|----------------|-----------------|------|
| Lipid, g/d           | 33 (23, 47)    | 30 (22, 43)     | 0.53 |
| Non-Obesity          | 35 (28, 52)    | 27 (20, 46)     | 0.20 |
| Obesity <sup>3</sup> | 29 (21, 37)    | 30 (23, 43)     |      |
| Cholesterol, mg/d    | 344 (209, 457) | 329 (232, 455)  | 0.93 |
| Dietary Fiber, g/d   | 24 (16, 34)    | 19 (12, 29)     | 0.01 |
| Non-Obesity          | 27 (17, 36) a  | 22 (12, 30) ab  | 0.03 |
| Obesity <sup>3</sup> | 22 (15, 33) ab | 19.4 (12, 29) b |      |

<sup>1</sup>The data are presented as medians and interquartile ranges (25%, 75%). Variables were compared using the non-parametric test of Kruskal-Wallis. Values with different letter differ significantly at  $P < 0.05$ . <sup>2</sup>Obesity was defined by BMI ( $\geq 30$  kg/m<sup>2</sup>), waist/hip circumference ratio (men  $\geq 0.9$  and women  $\geq 0.85$ ), visceral adiposity grade ( $\geq 10$ ) or/and body fat (men  $\geq 25$  % and women  $\geq 32$  %).

**Table S3.** Spearman correlation of MDNs intake with body adiposity index in the HS and sex-stratified subgroups<sup>1</sup>

| Subjects           | Body adiposity distribution | Folate intake |        | Total choline intake |       | Betaine intake |        |
|--------------------|-----------------------------|---------------|--------|----------------------|-------|----------------|--------|
|                    |                             | r             | p      | r                    | p     | r              | p      |
| Control<br>(n=104) | BMI                         | -0.068        | 0.497  | 0.032                | 0.746 | -0.048         | 0.629  |
|                    | Visceral fat                | 0.005         | 0.957  | -0.057               | 0.568 | -0.096         | 0.333  |
|                    | Waist/hip circumference     | -0.149        | 0.136  | -0.085               | 0.394 | -0.116         | 0.245  |
|                    | Total body fat              | -0.018        | 0.857  | -0.12                | 0.227 | -0.131         | 0.189  |
| HS<br>(n=105)      | BMI                         | -0.106        | 0.285  | 0.091                | 0.354 | -0.024         | 0.806  |
|                    | Visceral fat                | -0.293        | 0.003* | -0.058               | 0.061 | -0.228         | 0.002* |
|                    | Waist/hip circumference     | -0.169        | 0.089  | 0.034                | 0.735 | -0.151         | 0.126  |
|                    | Total body fat              | -0.119        | 0.233  | -0.136               | 0.17  | -0.048         | 0.627  |

<sup>1</sup>Association of MDNs intake with adiposity distribution indexes was analyzed by spearman correlation coefficient. \*Differences were considered to be statistically significant at  $P < 0.05$ .
